# Supplementary material for: A novel Li4Ti5O12-based high-performance lithium-ion electrode at elevated temperature
Source: Royal Society of Chemistry journal article supplement (doi:10.1039/c4ta05660d), 2015-01-01
Supplement: c4ta05660d1.pdf [file c4ta05660d1.pdf]

Supplementary Information for

**A Novel  $\text{Li}_4\text{Ti}_5\text{O}_{12}$ -based High-Performance Lithium Ion Electrode at Elevated Temperature**

Junling Guo<sup>a</sup>, Wenhua Zuo<sup>b</sup>, Yingjun Cai<sup>a</sup>, Shimou Chen<sup>a</sup>, Suojia Zhang<sup>a\*</sup> and  
Jinping Liu<sup>b\*</sup>

**Figures:**

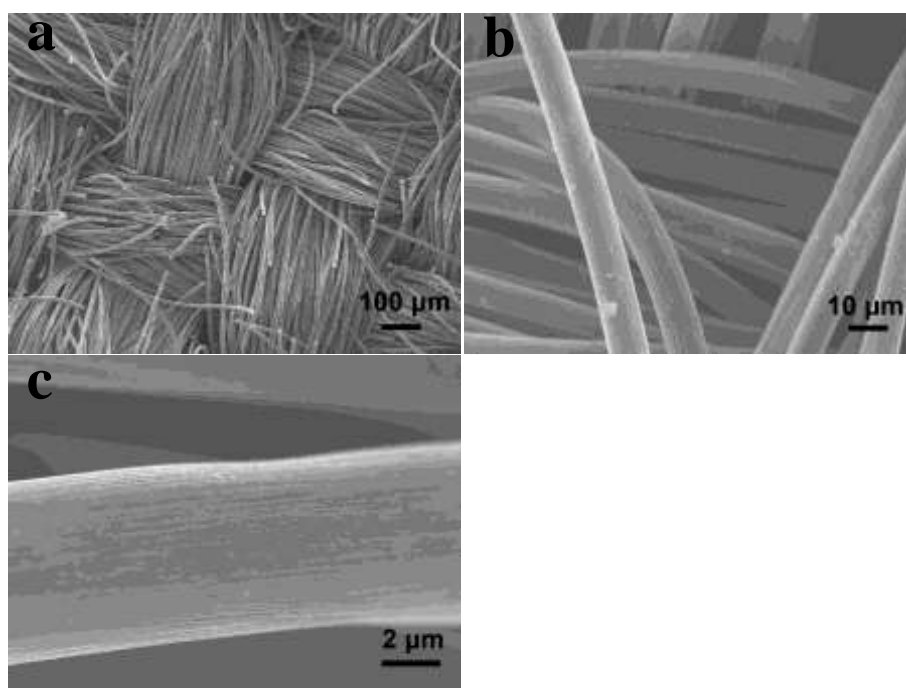

**Fig. S1.** SEM images of carbon cloth at different resolutions, showing the smooth surface of carbon fibers and the three-dimensional interconnected structure.

---

<sup>a</sup> Beijing Key Laboratory of Ionic Liquids Clean Process, Key Laboratory of Green Process and Engineering, State Key Laboratory of Multiphase Complex Systems, Institute of Process Engineering, Chinese Academy of Sciences, Beijing 100190, P. R. China. Email: [sjzhang@home.ipe.ac.cn](mailto:sjzhang@home.ipe.ac.cn)

<sup>b</sup> Institute of Nanoscience and Nanotechnology, Department of Physics, Central China Normal University, Wuhan 430079, Hubei, P.R. China. Email: [liujp@mail.ccnu.edu.cn](mailto:liujp@mail.ccnu.edu.cn)

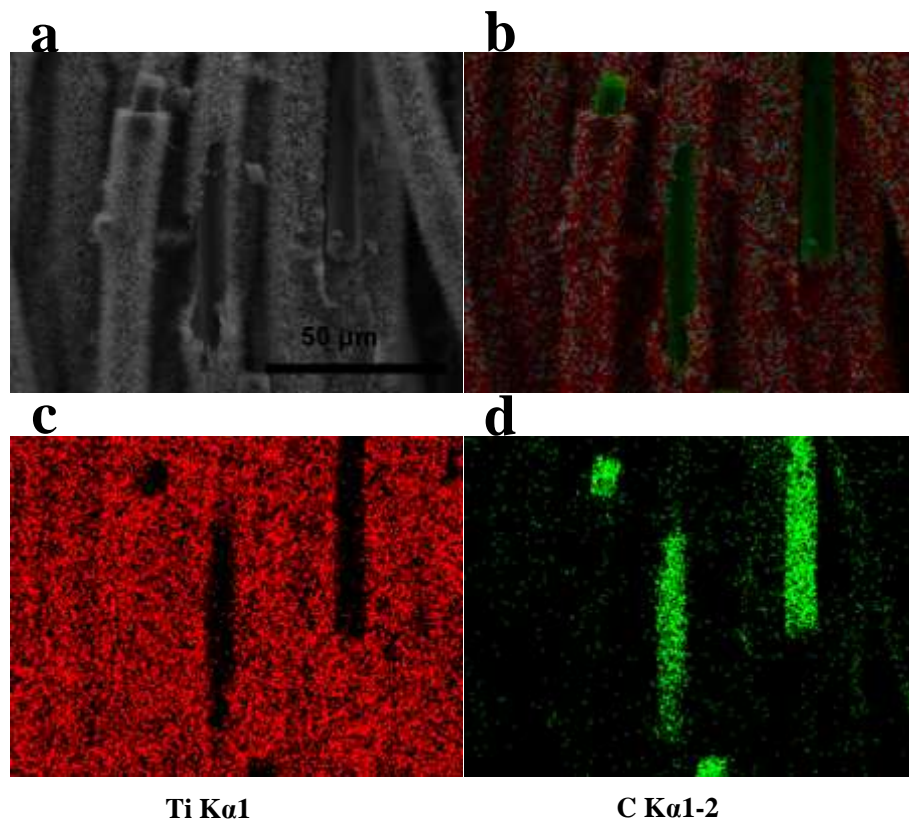

**Fig. S2.** EDX mapping of LTO-RTO nanowire array grown on the carbon cloth: (a) is the SEM. (b) is the hierarchical mapping image (both Ti and C). (c) is the distribution of Ti element. (d) is the distribution of C element.

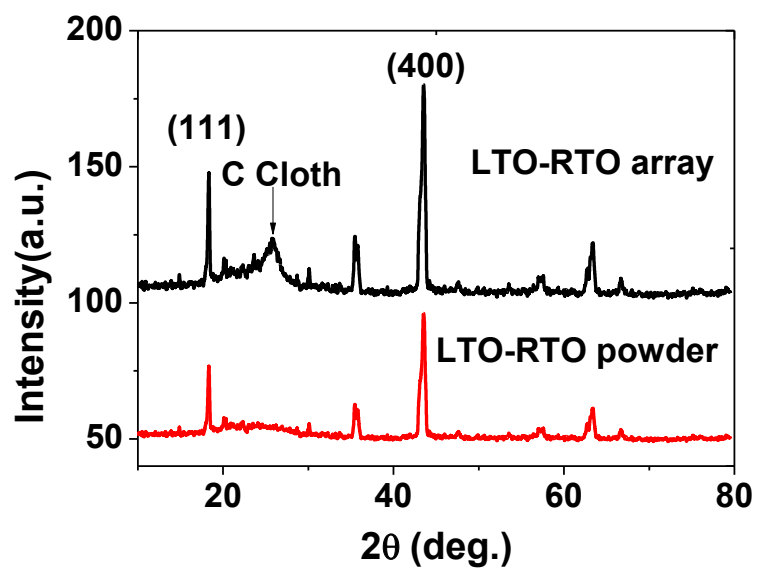

**Fig. S3.** XRD patterns of LTO-RTO nanowire array and LTO-RTO powder.

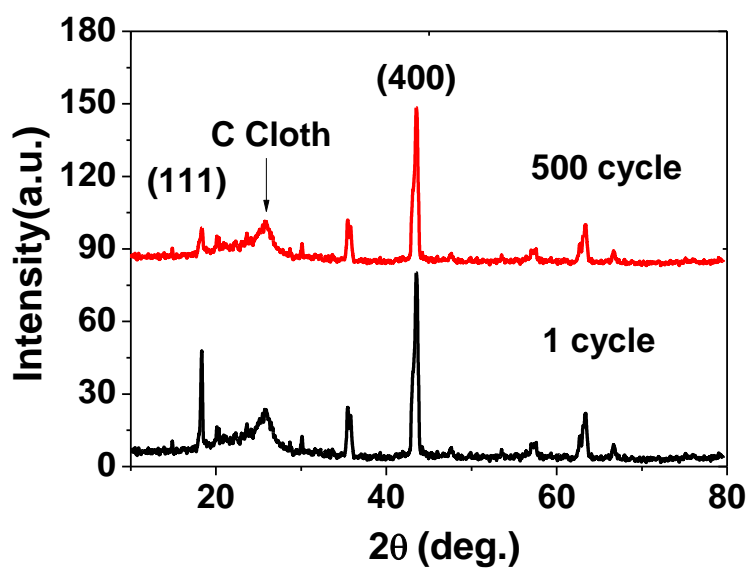

**Fig. S4.** The XRD patterns of 60 °C cycled 3: 1 LTO-RTO electrodes after different cycles.
